# Supplementary material for: Temperature and salinity jointly drive the toxicity of zinc oxide nanoparticles: a challenge to environmental risk assessment under global climate change
Source: Royal Society of Chemistry journal article supplement (doi:10.1039/d0en00467g), 2020-01-01
Supplement: d0en00467g1.pdf [file d0en00467g1.pdf]

## Supplementary Information

### **Temperature and salinity jointly drive the toxicity of zinc oxide nanoparticles: A challenge to environmental risk assessment under global climate change**

Racliffe Weng Seng Lai<sup>1,2</sup>, Mana Man Na Yung<sup>2</sup>, Guang-Jie Zhou<sup>1,2\*</sup>, Yan Ling He<sup>3,4</sup>, Alan Man Ching Ng<sup>3</sup>, Aleksandra B Djurišić<sup>4</sup>, Kaimin Shih<sup>5</sup>, Kenneth Mei Yee Leung<sup>1,2\*</sup>

1. State Key Laboratory of Marine Pollution and Department of Chemistry, City University of Hong Kong, Tat Chee Avenue, Kowloon, Hong Kong, China
2. The Swire Institute of Marine Science and School of Biological Sciences, The University of Hong Kong, Pokfulam, Hong Kong, China
3. Department of Physics, Southern University of Science and Technology, Shenzhen, China
4. Department of Physics, The University of Hong Kong, Pokfulam, Hong Kong, China
5. Department of Civil Engineering, The University of Hong Kong, Pokfulam, Hong Kong, China

\* Corresponding authors: Professor Kenneth Mei Yee, Leung; Dr. Guang-Jie Zhou

Corresponding Address: State Key Laboratory of Marine Pollution, City University of Hong Kong, Tat Chee Avenue, Kowloon, Hong Kong, China

Corresponding Tel. No.: +852 3442 7198

Corresponding Fax No.: +852 3442 0522

Corresponding Email: [kmyleung@cityu.edu.hk](mailto:kmyleung@cityu.edu.hk); [zhougj01@gmail.com](mailto:zhougj01@gmail.com)

## **Appendix A1. Determination of test temperature and salinity**

Temperature and salinity in the experiment were selected based on the realistic environmental conditions in Hong Kong seawaters, where the test animals, *T. japonicus*, were obtained<sup>1</sup> (Fig. S1). Temperature in rock pools during the summer of Hong Kong could be between 26 to 32 °C while it was between 15 to 18 °C during winter<sup>2</sup>. Comparatively, the average salinity at the sea surface of Hong Kong could range from 12.5 to 33.8 PSU during the wet and dry seasons<sup>1</sup>. In extreme cases, the salinity could even drop to 1 PSU in intertidal zone after heavy precipitation<sup>3</sup>. Influence of global climate change is evident in Hong Kong. For example, an increase of about 1.25 °C and a continuous upward trend of extreme hot weather was observed in Hong Kong throughout the last century<sup>4,5</sup>. Likewise, dramatic rainfalls have been recorded in the past and predicted to become more frequent<sup>6,7</sup>, which could draw the salinity to further downward extremes. Therefore, an increase of 4.8 °C in temperature, as predicted by IPCC<sup>8</sup>, was also considered as a worst-case scenario (Fig. S1).

## Appendix A2. Response Surface Model

The response surface model (RSM) was constructed using a two-factor multilevel factorial design by Design-Expert (v11., Stat-Ease Inc., U.S.A.), following a five-tiered approach: (1) the initial fitting model was proposed by the software based on a basket of factors, including model  $p$ -value, lack-of-fit  $p$ -value, adjusted and predicted  $r^2$ ; (2) components within the initial model were further screened based on their  $p$ -value, Akaike information criterion (AIC) and hierarchical structure of the model; (3) the final model was confirmed by the final model  $p$ -value, lack-of-fit  $p$ -value, adjusted  $r^2$  and predicted  $r^2$  using ANOVA analysis, as well as the variance inflation factor (VIF) of each component; (4) diagnosis of the final model on the fitted data was further performed using normal probability plot and residual plot, and (5) model that required the least transformation of data and met all above criteria was selected.

Following is a basic form of the model equation:

$$Y(x_A, x_B) = k + a_A x_A + a_B x_B + a_{AB} x_A x_B + b_A x_A^2 + b_B x_B^2 \cdots + n_A x_A^n + n_B x_B^n \cdots$$

RSM equation where  $Y$  is the response of the rotifer while  $x_A$  and  $x_B$  are doses of the two chemicals in the mixture;  $k$  and  $a, b, \dots, n, \dots$  are the coefficients of the regression equation.

The results suggested that there was a differential interaction between temperature and salinity on the toxicity of the chemicals (Table S4). For ZnO-NPs, only temperature had a significant effect on their toxicity and there was a significant interaction of the temperature and salinity at the secondary level. For ZnO-BKs, both temperature and salinity had a significant effect on the toxicity but the two factors interacted only at tertiary level. For Zn-IONs, both factors had a significant effect on their toxicity and they interacted at secondary and tertiary levels. Meanwhile, over-interpretation on these interaction terms should be avoided as they were just describing the changes of calculated  $LC_{50}$  along with temperature and salinity, and could be subjected to experimental variations<sup>9,10</sup>. However, given the distinct difference in monitored physicochemical properties of the three chemicals and their observed toxicity, it should be conceivable that these three chemicals had different interactions with temperature and salinity.

### **Appendix A3. Current marine water quality criteria**

Lai et al.<sup>11</sup> found a large deficiency in the current regulations of products containing engineered nanoparticles. Although a case-by-case risk evaluation has been adopted for the products in some commercial sectors, most of the reviewed regulations did not distinguish engineered nanoparticles from their bulk- and ionic counterparts<sup>11</sup>. This has raised a concern over the potential influences of engineered nanoparticles on the environment and human health<sup>12,13</sup>.

Given the limited information about nano-specific water quality criteria, the predicted toxicity values of ZnO-NPs and the associated chemicals in this study were only compared to the existing water quality criteria for Zn ions (Table S1). The range of current predicted environmental concentrations of ZnO-NPs in the surface water is between around 0.0001 µg/L and 76 µg/L<sup>14-16</sup>, which could be comparable to current criteria for Zn ions (Table S1) and the predicted LC<sub>10</sub> of ZnO-NPs in this study (Fig. S5). Nevertheless, the predicted environmental concentrations of ZnO-NPs from the same research group have been increased by 10 times within 5 years, implying their increased contamination and potential negative impact in the environment<sup>14,15</sup>. Therefore, the results of the prediction of the toxicity of ZnO-NPs in different salinity and temperature, as demonstrated in this study, could provide useful information for developing site-species water quality criteria of ZnO-NPs that will provide better protection to aquatic ecosystems around the world.

## Temperature and salinity in Hong Kong

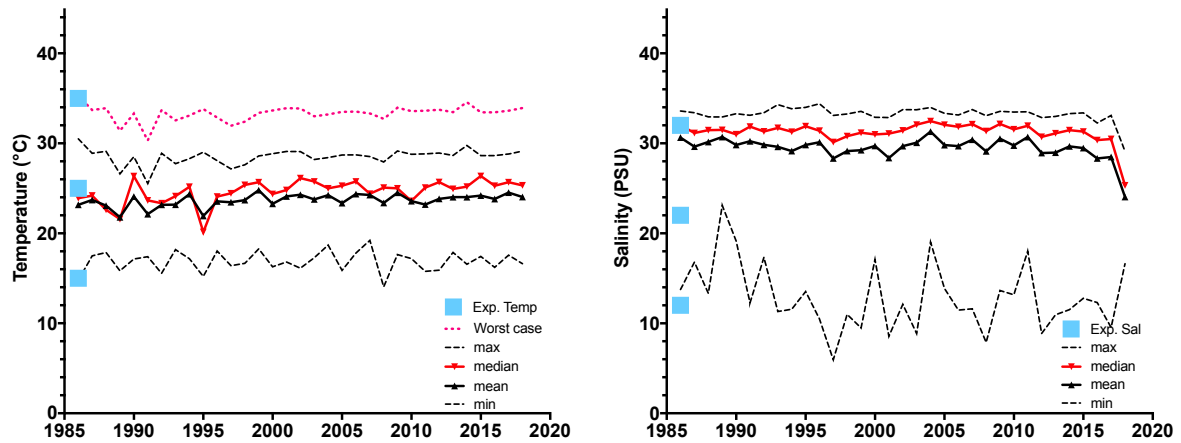

**Fig. S1** Variation of temperature and salinity over the years in Hong Kong waters (Mirs Bay, Southern, North Western and Victoria Harbour), superimposed with selected experimental conditions. Line of the worst case in temperature implies the increment predicted by IPCC under the highest emission scenario.

## Morphology and size of the particles

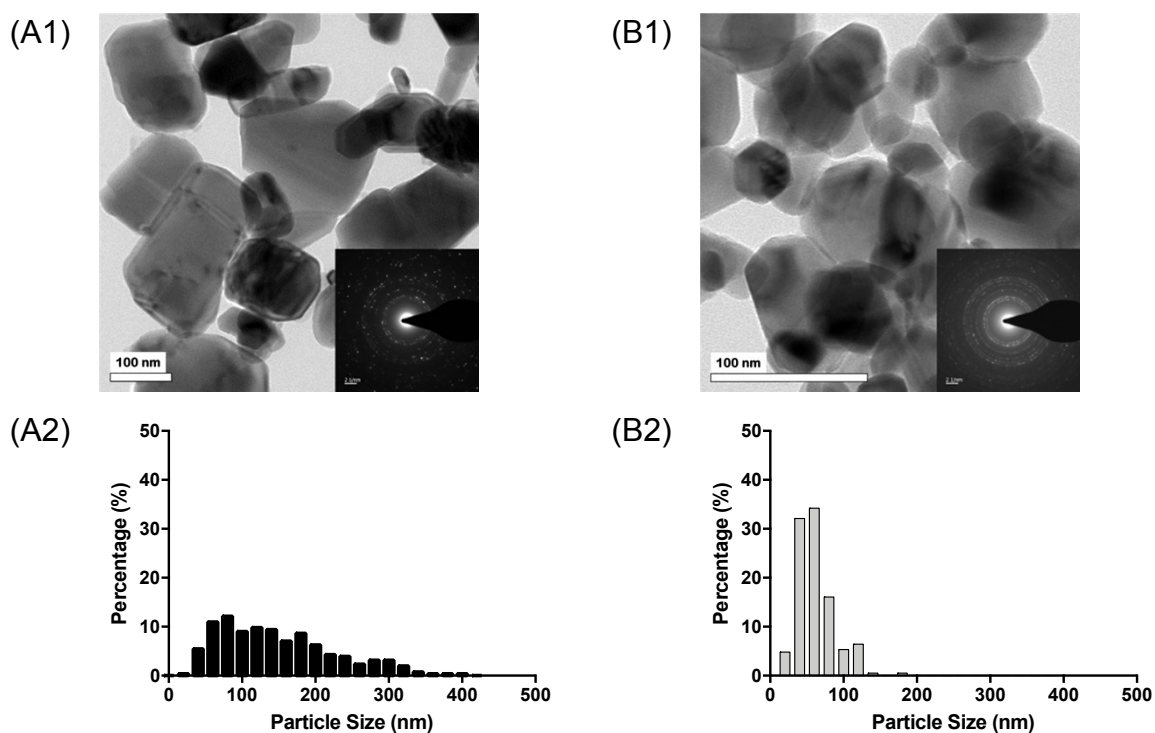

**Fig. S2** (1) TEM image and (2) size distribution of dry powder of (A) ZnO-BKs and (B) ZnO-NPs. Inset at the bottom right corner of A1 and B1 are the SAED patterns of the particles; the central diffraction spot is masked by a shield in order to record the pattern.

### Crystal phase of the particles

The X-Ray Diffraction analysis confirmed that both ZnO-BKs and ZnO-NPs share a comparable crystal phase, i.e. hexagonal wurtzite<sup>17,18</sup>.

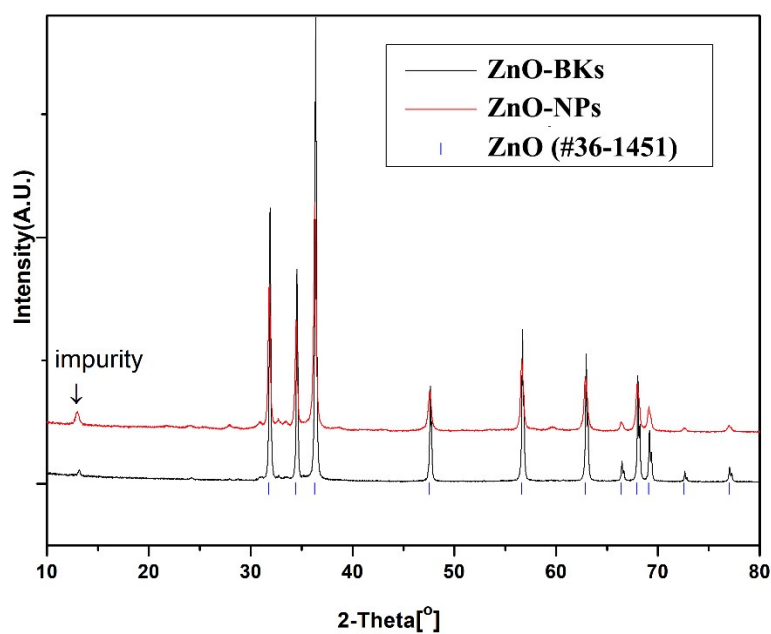

**Fig. S3** Crystal phase of ZnO-BKs and ZnO-NPs.

## ROS signal of the chemicals

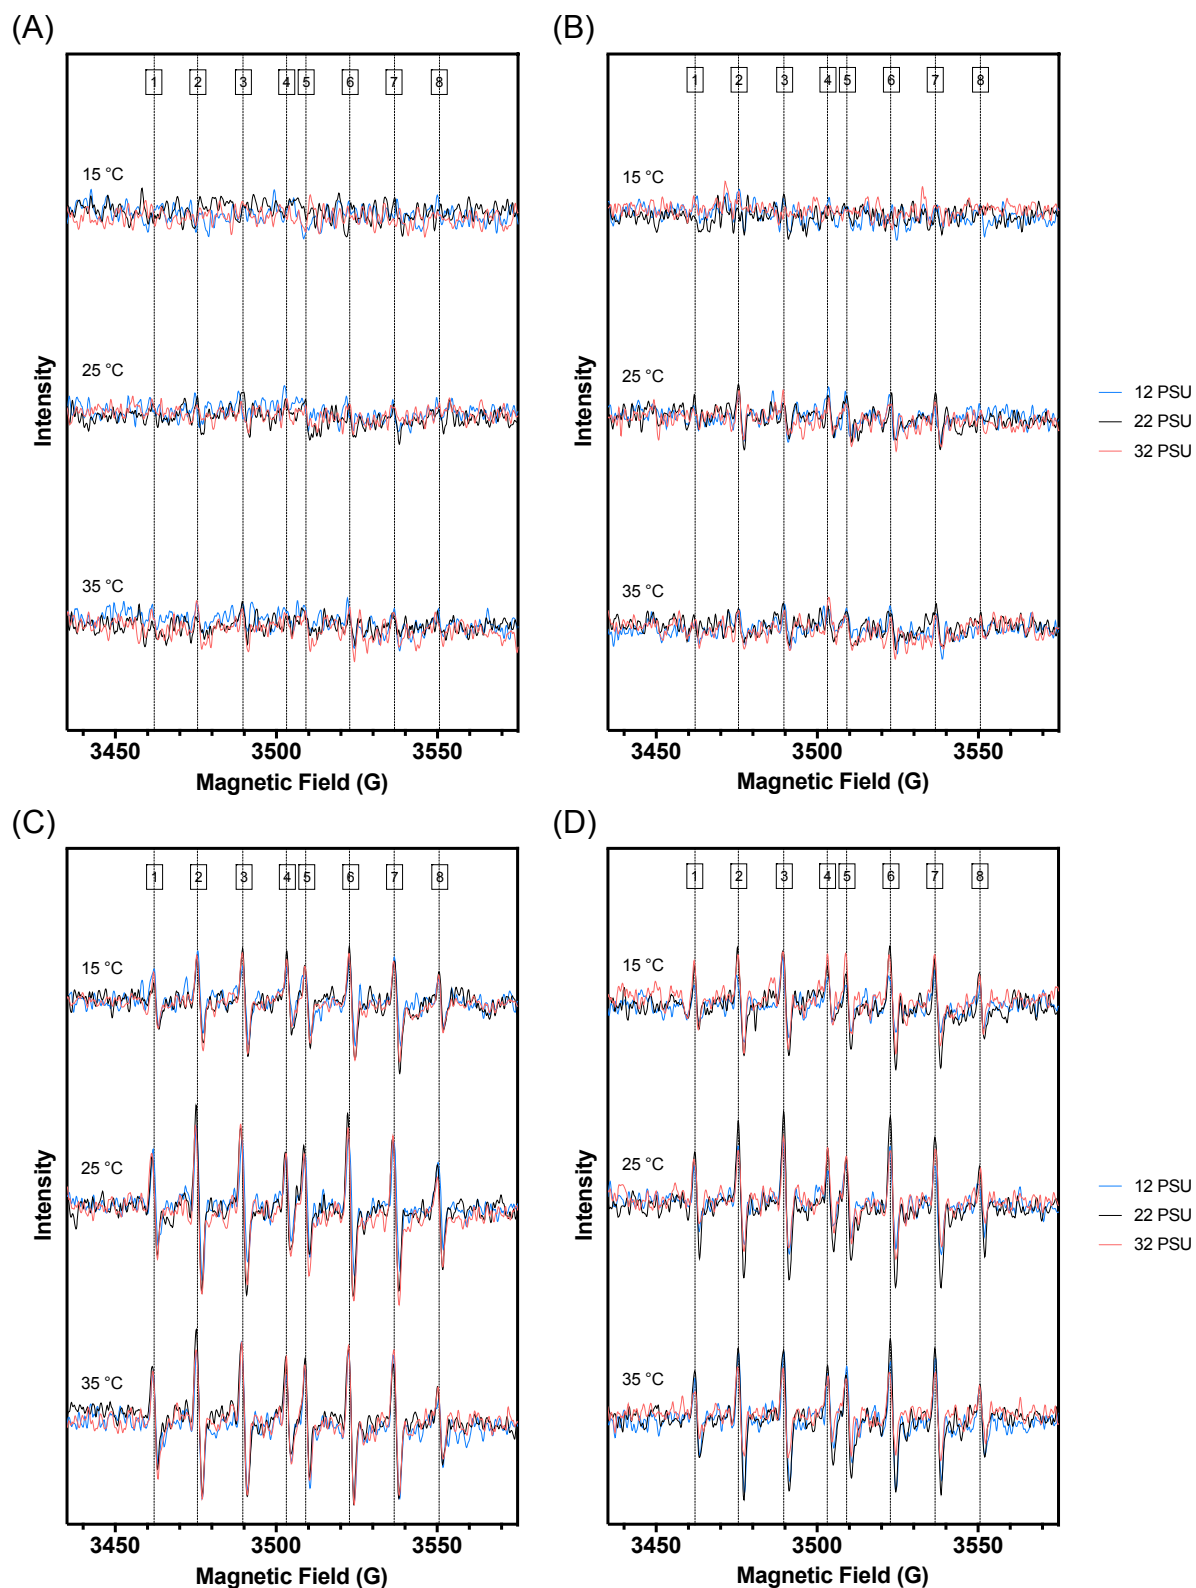

**Fig. S4** ROS intensity in the solutions of (A) FASW, (B) Zn-IONs, (C) ZnO-NPs and (D) ZnO-BKs under the influence of different temperatures and salinities.



## RSM results

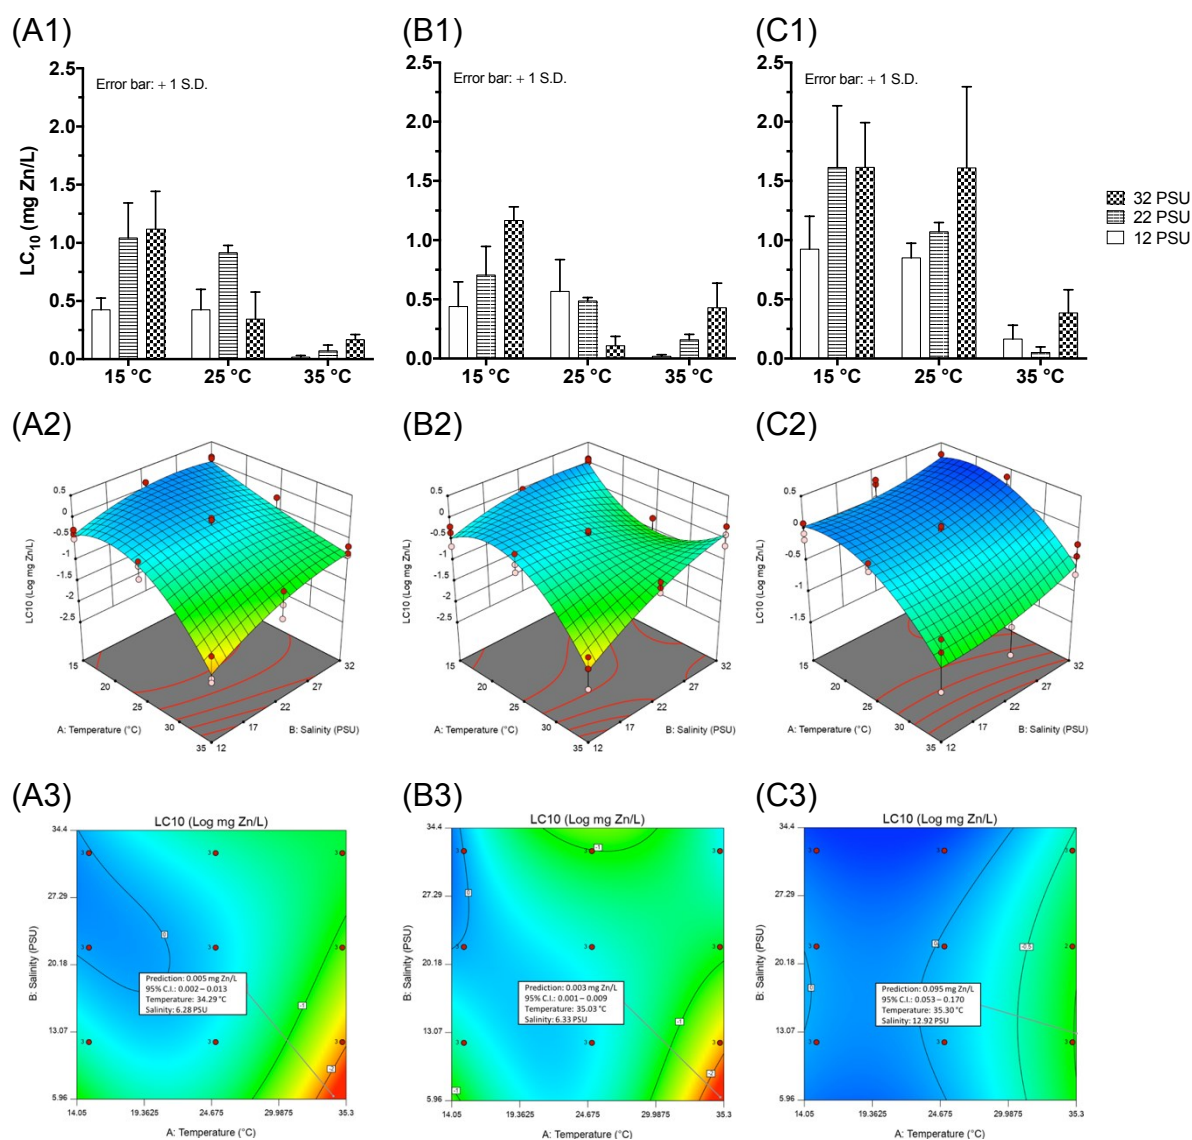

**Fig. S5** LC<sub>10</sub> of (A) ZnO-NPs, (B) ZnO-BKs and (C) Zn-IONs under the influence of different temperatures and salinities.

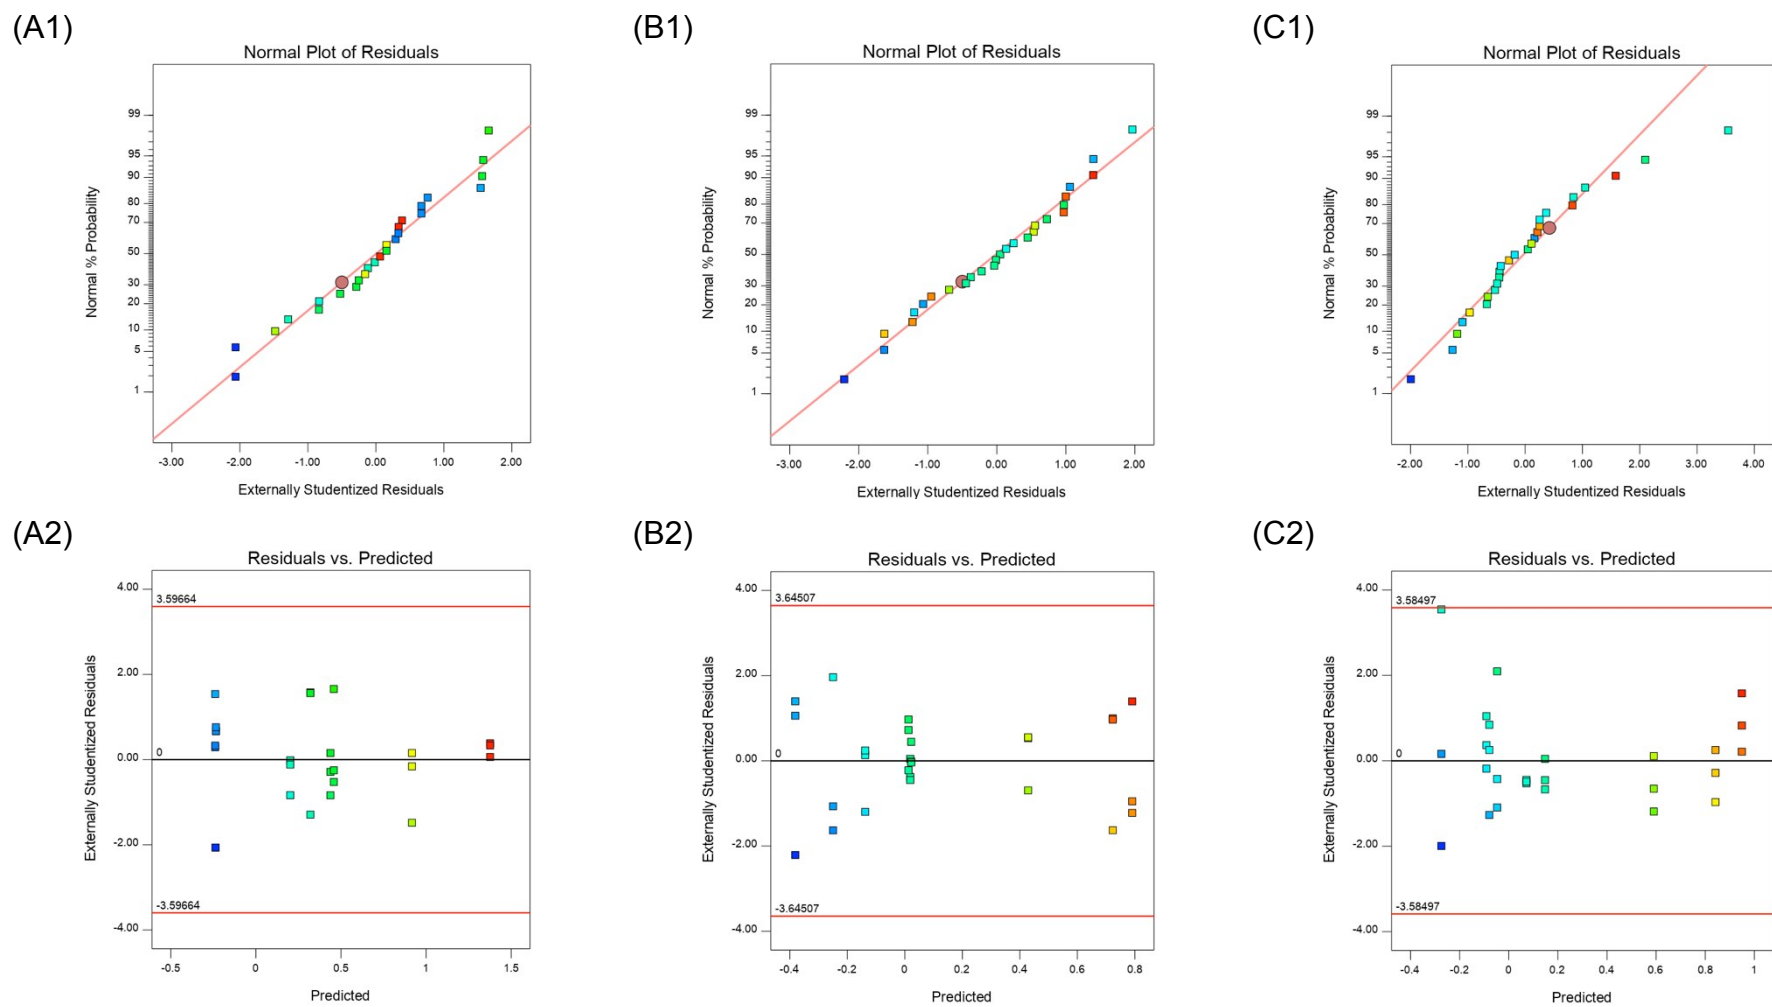

**Fig. S6** (1) Normal probability plot and (2) Residual plot for the response surface model of (A) Zn-IONs, (B) ZnO-BKs and (C) ZnO-NPs under the influence of different temperatures and salinities.

### Marine water quality criteria of zinc in different countries

Marine water quality criteria of zinc in different countries were surveyed. Some countries have applied different water quality criteria for water zones with different beneficial uses. The strictest criteria (the smallest value) and the loosest criteria (the largest value) are indicated in Fig. 8.

**Table S1** Marine water quality criteria of zinc in different countries for water zones with different beneficial uses.

| Countries          |                                                                                          | Values (µg/L)                                                                                                                                                                                                                                                                                                                        | Sources |
|--------------------|------------------------------------------------------------------------------------------|--------------------------------------------------------------------------------------------------------------------------------------------------------------------------------------------------------------------------------------------------------------------------------------------------------------------------------------|---------|
| <b>Viet Nam</b>    | National Technical Regulation on Coastal Water Quality                                   | Ocean areas: 20<br>Sea areas: 50<br>Coastal aquaculture: 500<br>Coastal beaches and recreation area: 1000<br>Other coastal areas: 2000                                                                                                                                                                                               | 19      |
| <b>Philippines</b> | Water Quality Guidelines and General Effluent Standards                                  | Protected waters (Class SA): 40<br>Fishery and recreation (Class SB): 50<br>Fishery and recreation (Class SC): 800<br>Navigable waters (Class SD): 1500<br>Marine protection rea (Type I): 20<br>Aquaculture area and beaches (Type II): 50<br>General industrial and recreation area (Type III): 100<br>Harbour area (Type IV): 500 | 19      |
| <b>China</b>       | Sea water quality standard (GB 3097-1997)                                                | Coastal waters: 100                                                                                                                                                                                                                                                                                                                  | 20      |
| <b>Korea</b>       | Environmental Standards for Water Quality and Aquatic Ecosystem                          | Saltwater Criterion Continuous Concentration: 81<br>Saltwater Criterion Maximum Concentration: 90                                                                                                                                                                                                                                    | 19      |
| <b>USA</b>         | National Recommended Aquatic Life Criteria table                                         | Marine ecosystem: 50<br>Marine recreation: 95<br>Ports and harbours: 100                                                                                                                                                                                                                                                             | 21      |
| <b>Indonesia</b>   | Standard Quality of Seawater                                                             | Marine Protected Areas (Class I): 15<br>Recreational and Mariculture (Class 2): 50<br>Ports, Oil & Gas Fields (Class 3): 100<br>Estuarine (Class 4): 50                                                                                                                                                                              | 19      |
| <b>Malaysia</b>    | Marine Water Quality Criteria and Standard                                               | 99% of species protection: 7<br>95% of species protection: 15<br>99% of species protection: 23<br>99% of species protection: 43                                                                                                                                                                                                      | 19      |
| <b>Australia</b>   | Toxicant default guideline values for water quality in aquatic ecosystems (Marine Water) | 40                                                                                                                                                                                                                                                                                                                                   | 22      |
| <b>UK</b>          | Guidelines for managing water quality impacts within UK European marine sites            | Coastal waters: 10 – 20                                                                                                                                                                                                                                                                                                              | 23      |
| <b>Japan</b>       | Environmental Quality Standards for Water Pollution                                      |                                                                                                                                                                                                                                                                                                                                      | 19      |

19. WEPA, 2017; 20. Ministry of Ecology and Environment of China (GB 3097-1997), 1998; 21. USEPA, 1995; 22. Australian Government Initiative, 2019; 23. Cole et. Al., 2010.

## **ANOVA results**

**Table S2**

Abbreviations: Temp: temperature; Sal: salinity; chem: chemical

| <b>(A) Hydrodynamic size</b> |                                |           |                    |                |                |
|------------------------------|--------------------------------|-----------|--------------------|----------------|----------------|
| <b>Source</b>                | <b>Type III Sum of Squares</b> | <b>df</b> | <b>Mean Square</b> | <b>F-value</b> | <b>p-value</b> |
| temp                         | 34594.04                       | 2         | 17297.02           | 19.99          | < 0.001*       |
| sal                          | 14759.70                       | 2         | 7379.85            | 8.53           | 0.001*         |
| chem                         | 12696.00                       | 1         | 12696.00           | 14.68          | < 0.001*       |
| temp * sal                   | 8116.41                        | 4         | 2029.10            | 2.35           | 0.073          |
| temp * chem                  | 4773.44                        | 2         | 2386.72            | 2.76           | 0.077          |
| sal * chem                   | 14983.11                       | 2         | 7491.56            | 8.66           | 0.001*         |
| temp * sal * chem            | 919.44                         | 4         | 229.86             | 0.27           | 0.898          |
| Error                        | 31144.00                       | 36        | 865.11             |                |                |
| Total                        | 32206382.00                    | 54        |                    |                |                |
| Corrected Total              | 121986.15                      | 53        |                    | 7491.5555      |                |

| <b>(B) Zeta potential</b> |                                |           |                    |                |                |
|---------------------------|--------------------------------|-----------|--------------------|----------------|----------------|
| <b>Source</b>             | <b>Type III Sum of Squares</b> | <b>df</b> | <b>Mean Square</b> | <b>F-value</b> | <b>p-value</b> |
| temp                      | 314.87                         | 2         | 157.44             | 15.32          | < 0.001*       |
| sal                       | 4.39                           | 2         | 2.20               | 0.21           | 0.809          |
| chem                      | 9.71                           | 1         | 9.71               | 0.94           | 0.338          |
| temp * sal                | 33.65                          | 4         | 8.41               | 0.82           | 0.522          |
| temp * chem               | 23.80                          | 2         | 11.90              | 1.16           | 0.326          |
| sal * chem                | 48.36                          | 2         | 24.18              | 2.35           | 0.110          |
| temp * sal * chem         | 33.70                          | 4         | 8.43               | 0.82           | 0.521          |
| Error                     | 370.08                         | 36        | 10.28              |                |                |
| Total                     | 4373.13                        | 54        |                    |                |                |
| Corrected Total           | 838.57                         | 53        |                    |                |                |

| <b>(C) Ion dissolution</b> |                                |           |                    |                |                |
|----------------------------|--------------------------------|-----------|--------------------|----------------|----------------|
| <b>Source</b>              | <b>Type III Sum of Squares</b> | <b>df</b> | <b>Mean Square</b> | <b>F-value</b> | <b>p-value</b> |
| Temp                       | 965.27                         | 2         | 482.63             | 127.02         | < 0.001*       |
| sal                        | 470.46                         | 2         | 235.23             | 61.91          | < 0.001*       |
| chem                       | 64.65                          | 1         | 64.65              | 17.02          | < 0.001*       |
| temp * sal                 | 74.28                          | 4         | 18.57              | 4.89           | 0.002*         |
| temp * chem                | 214.61                         | 2         | 107.30             | 28.24          | < 0.001*       |
| sal * chem                 | 93.11                          | 2         | 46.55              | 12.25          | < 0.001*       |
| tem * sal * chem           | 70.82                          | 4         | 17.70              | 4.66           | 0.003*         |
| Error                      | 205.18                         | 54        | 3.80               |                |                |

|                 |         |    |
|-----------------|---------|----|
| Total           | 9441.72 | 72 |
| Corrected Total | 2158.38 | 71 |

| (D) LC <sub>50</sub> |                         |    |             |         |          |
|----------------------|-------------------------|----|-------------|---------|----------|
| Source               | Type III Sum of Squares | df | Mean Square | F-value | p-value  |
| temp                 | 13.34                   | 2  | 6.67        | 692.86  | < 0.001* |
| sal                  | 0.60                    | 2  | 0.30        | 30.96   | < 0.001* |
| chem                 | 0.47                    | 2  | 0.23        | 24.36   | < 0.001* |
| temp * sal           | 0.86                    | 4  | 0.21        | 22.24   | < 0.001* |
| temp * chem          | 0.81                    | 4  | 0.20        | 21.10   | < 0.001* |
| sal * chem           | 0.72                    | 4  | 0.18        | 18.73   | < 0.001* |
| temp * sal * chem    | 0.61                    | 8  | 0.08        | 7.87    | < 0.001* |
| Error                | 0.52                    | 54 | 0.01        |         |          |
| Total                | 22.24                   | 81 |             |         |          |
| Corrected Total      | 17.92                   | 80 |             |         |          |

| (E) GST           |                         |    |             |         |          |
|-------------------|-------------------------|----|-------------|---------|----------|
| Source            | Type III Sum of Squares | df | Mean Square | F-value | p-value  |
| temp              | 0.06                    | 2  | 0.028       | 31.62   | < 0.001* |
| sal               | 0.05                    | 2  | 0.024       | 26.58   | < 0.001* |
| chem              | 0.05                    | 2  | 0.022       | 24.80   | < 0.001* |
| temp * sal        | 0.00                    | 4  | 0.001       | 1.22    | 0.313    |
| temp * chem       | 0.03                    | 4  | 0.007       | 7.32    | < 0.001* |
| sal * chem        | 0.01                    | 4  | 0.001       | 1.45    | 0.230    |
| temp * sal * chem | 0.01                    | 8  | 0.002       | 1.84    | 0.089    |
| Error             | 0.05                    | 54 | 0.001       |         |          |
| Total             | 349.21                  | 81 |             |         |          |
| Corrected Total   | 0.25                    | 80 |             |         |          |

| (F) SOD           |                         |    |             |         |          |
|-------------------|-------------------------|----|-------------|---------|----------|
| Source            | Type III Sum of Squares | df | Mean Square | F-value | p-value  |
| temp              | 0.07                    | 2  | 0.036       | 39.53   | < 0.001* |
| sal               | 0.06                    | 2  | 0.032       | 35.14   | < 0.001* |
| chem              | 0.00                    | 2  | 0.002       | 1.82    | 0.172    |
| temp * sal        | 0.02                    | 4  | 0.004       | 4.15    | 0.005*   |
| temp * chem       | 0.01                    | 4  | 0.003       | 3.00    | 0.026*   |
| sal * chem        | 0.01                    | 4  | 0.003       | 3.20    | 0.020*   |
| temp * sal * chem | 0.02                    | 8  | 0.002       | 2.23    | 0.039*   |
| Error             | 0.05                    | 54 | 0.001       |         |          |
| Total             | 335.86                  | 81 |             |         |          |

|                        |      |    |
|------------------------|------|----|
| <b>Corrected Total</b> | 0.24 | 80 |
|------------------------|------|----|

**Table S3** Toxicity of the test chemicals under different temperatures and salinities.

|                           |         | <b>LC<sub>10</sub> ± 1 S.D. (mg Zn/L)</b> | <b>LC<sub>50</sub> ± 1 S.D. (mg Zn/L)</b> |
|---------------------------|---------|-------------------------------------------|-------------------------------------------|
| <b>Temperature: 15 °C</b> |         |                                           |                                           |
| <b>12 PSU</b>             | Zn-IONs | 0.92 ± 0.28                               | 3.05 ± 0.66                               |
|                           | ZnO-BKs | 0.44 ± 0.21                               | 2.75 ± 0.30                               |
|                           | ZnO-NPs | 0.42 ± 0.10                               | 3.43 ± 0.53                               |
| <b>22 PSU</b>             | Zn-IONs | 1.61 ± 0.52                               | 7.58 ± 1.21                               |
|                           | ZnO-BKs | 0.71 ± 0.24                               | 6.03 ± 1.41                               |
|                           | ZnO-NPs | 1.04 ± 0.30                               | 11.12 ± 1.82                              |
| <b>32 PSU</b>             | Zn-IONs | 1.61 ± 0.38                               | 24.94 ± 0.78                              |
|                           | ZnO-BKs | 1.17 ± 0.12                               | 5.49 ± 1.15                               |
|                           | ZnO-NPs | 1.12 ± 0.33                               | 6.46 ± 0.93                               |
| <b>Temperature: 25 °C</b> |         |                                           |                                           |
| <b>12 PSU</b>             | Zn-IONs | 0.85 ± 0.12                               | 1.51 ± 0.12                               |
|                           | ZnO-BKs | 0.57 ± 0.27                               | 1.00 ± 0.04                               |
|                           | ZnO-NPs | 0.42 ± 0.18                               | 0.91 ± 0.14                               |
| <b>22 PSU</b>             | Zn-IONs | 1.05 ± 0.07                               | 2.42 ± 0.69                               |
|                           | ZnO-BKs | 0.49 ± 0.03                               | 1.12 ± 0.12                               |
|                           | ZnO-NPs | 0.91 ± 0.06                               | 1.29 ± 0.12                               |
| <b>32 PSU</b>             | Zn-IONs | 1.61 ± 0.68                               | 2.60 ± 0.23                               |
|                           | ZnO-BKs | 0.11 ± 0.08                               | 0.56 ± 0.17                               |
|                           | ZnO-NPs | 0.35 ± 0.23                               | 0.84 ± 0.21                               |
| <b>Temperature: 35 °C</b> |         |                                           |                                           |
| <b>12 PSU</b>             | Zn-IONs | 0.16 ± 0.12                               | 0.66 ± 0.08                               |
|                           | ZnO-BKs | 0.02 ± 0.01                               | 0.44 ± 0.11                               |
|                           | ZnO-NPs | 0.02 ± 0.01                               | 0.97 ± 0.39                               |
| <b>22 PSU</b>             | Zn-IONs | 0.06 ± 0.07                               | 0.34 ± 0.13                               |
|                           | ZnO-BKs | 0.17 ± 0.03                               | 0.70 ± 0.08                               |
|                           | ZnO-NPs | 0.07 ± 0.05                               | 1.04 ± 0.01                               |
| <b>32 PSU</b>             | Zn-IONs | 0.39 ± 0.20                               | 0.75 ± 0.16                               |
|                           | ZnO-BKs | 0.43 ± 0.21                               | 1.08 ± 0.05                               |
|                           | ZnO-NPs | 0.17 ± 0.04                               | 0.65 ± 0.36                               |

**Table S4** RSM model for the effect of temperature and salinity on chemicals: (A) Zn-IONS, (B) ZnO-BKs and (C) Zn-NPs. *p*-value with an asterisk represents the significant term at  $\alpha = 0.05$ .

| <b>(A) Zn-IONS</b> |                |    |             |         |           |
|--------------------|----------------|----|-------------|---------|-----------|
| Source             | Sum of Squares | df | Mean Square | F-value | p-value   |
| Model              | 7.010          | 5  | 1.400       | 170.280 | < 0.0001* |
| A-Temperature      | 5.640          | 1  | 5.640       | 685.410 | < 0.0001* |
| B-Salinity         | 0.084          | 1  | 0.084       | 10.180  | 0.0046*   |
| AB                 | 0.627          | 1  | 0.627       | 76.220  | < 0.0001* |
| A <sup>2</sup>     | 0.002          | 1  | 0.002       | 0.290   | 0.5962    |
| A <sup>2</sup> B   | 0.051          | 1  | 0.051       | 6.140   | 0.0223*   |
| Residual           | 0.165          | 20 | 0.008       |         |           |
| Lack of Fit        | 0.089          | 3  | 0.030       | 6.720   | 0.0034*   |
| Pure Error         | 0.075          | 17 | 0.004       |         |           |
| Cor Total          | 7.170          | 25 |             |         |           |

Model equation in terms of coded factors:

$$Y(A,B) = 0.320 - 0.577A + 0.118B - 0.229AB + 0.020A^2 + 0.112A^2B$$

Model equation in terms of actual factors:

$$Y(A,B) = -1.174 + 0.106A + 0.139B - 0.008AB - 0.002A^2 + 0.0001A^2B$$

| <b>(B) ZnO-BKs</b> |                |    |             |         |           |
|--------------------|----------------|----|-------------|---------|-----------|
| Source             | Sum of Squares | df | Mean Square | F-value | p-value   |
| Model              | 4.180          | 7  | 0.597       | 89.840  | < 0.0001* |
| A-Temperature      | 1.290          | 1  | 1.290       | 194.790 | < 0.0001* |
| B-Salinity         | 0.108          | 1  | 0.108       | 16.280  | 0.0007*   |
| AB                 | 0.009          | 1  | 0.009       | 1.330   | 0.2624    |
| A <sup>2</sup>     | 0.591          | 1  | 0.591       | 88.930  | < 0.0001* |
| B <sup>2</sup>     | 0.099          | 1  | 0.099       | 14.860  | 0.0011*   |
| A <sup>2</sup> B   | 0.381          | 1  | 0.381       | 57.370  | < 0.0001* |
| AB <sup>2</sup>    | 0.030          | 1  | 0.030       | 4.520   | 0.0468*   |
| Residual           | 0.126          | 19 | 0.007       |         |           |
| Lack of Fit        | 0.009          | 1  | 0.009       | 1.360   | 0.2582    |
| Pure Error         | 0.117          | 18 | 0.007       |         |           |
| Cor Total          | 4.300          | 26 |             |         |           |

Model equation in terms of coded factors:

$$Y(A,B) = 0.013 - 0.464A - 0.134B + 0.027AB + 0.314A^2 - 0.128B^2 + 0.309A^2B + 0.087AB^2$$

Model equation in terms of actual factors:

$$Y(A,B) = -2.334 + 0.172A + 0.324B - 0.019AB - 0.004A^2 - 0.003B^2 + 0.0003A^2B + 0.0001AB^2$$



| (C) ZnO-NPs    |                |    |             |         |           |  |
|----------------|----------------|----|-------------|---------|-----------|--|
| Source         | Sum of Squares | df | Mean Square | F-value | p-value   |  |
| Model          | 4.750          | 5  | 0.950       | 65.500  | < 0.0001* |  |
| A-Temperature  | 3.460          | 1  | 3.460       | 238.780 | < 0.0001* |  |
| B-Salinity     | 0.001          | 1  | 0.001       | 0.045   | 0.8347    |  |
| AB             | 0.171          | 1  | 0.171       | 11.820  | 0.0025*   |  |
| A <sup>2</sup> | 0.789          | 1  | 0.789       | 54.440  | < 0.0001* |  |
| B <sup>2</sup> | 0.325          | 1  | 0.325       | 22.420  | 0.0001*   |  |
| Residual       | 0.305          | 21 | 0.015       |         |           |  |
| Lack of Fit    | 0.065          | 3  | 0.022       | 1.630   | 0.2183    |  |
| Pure Error     | 0.240          | 18 | 0.013       |         |           |  |
| Cor Total      | 5.050          | 26 |             |         |           |  |

Model equation in terms of coded factors:

$$Y(A,B) = 0.148 - 0.439A + 0.006B - 0.120AB + 3.363A^2 - 0.233B^2$$

Model equation in terms of actual factors:

$$Y(A,B) = -1.714 - 0.199A + 0.132B - 0.001AB + 0.004A^2 - 0.002B^2$$

## References

1. Environmental Protection Department of Hong Kong (EPD). (2020). Marine Water Quality Data. Retrieved from <https://cd.epic.epd.gov.hk/EPICRIVER/marine/?lang=en> (accessed on 4 April 2020)
2. Chan, B. K. K., Diurnal physico-chemical variations in Hong Kong rock pools, *Asian. Mar. Biol.*, 2000, **17**, 43-54.
3. Firth, L. B., & Williams, G. A., The influence of multiple environmental stressors on the limpet *Cellana toreuma* during the summer monsoon season in Hong Kong, *J. Exp. Mar. Biol. Ecol.*, 2009, **375**, 70-75.
4. Wong, M. C., Mok, H. Y., & Lee, T. C., Observed changes in extreme weather indices in Hong Kong, *Int. J. Climatol.*, 2011, **31**, 2300-2311.
5. Lai, R. W. S., Perkins, M. J., Ho, K. K. Y., Astudillo, J. C., Yung, M. M. N., Russell, B. D., Williams, G. A., & Leung, K. M. Y., Hong Kong's marine environments: history, challenges and opportunities, *Reg. Stud. Mar. Sci.*, 2016, **8**, 259-273.
6. Zhang, Q., Xu, C. Y., Becker, S., Zhang, Z. X., Chen, Y. D., & Coulibaly, M., Trends and abrupt changes of precipitation maxima in the Pearl River basin, China, *Atmos. Sci. Lett.*, 2009, **10**, 132-144.
7. Lee, T. C., Chan, K. Y., Chan, H. S., & Kok, M. H., Projections of extreme rainfall in hong kong in the 21st century. *Acta. Meteorol. Sin.*, 2011, **25**, 691-709.
8. Intergovernmental Panel on Climate Change (IPCC). (2014). Climate Change 2014: Synthesis Report. Retrieved from <https://www.ipcc.ch/report/ar5/syr/> (accessed on 4 April 2020)
9. Rispoli, F., Angelov, A., Badia, D., Kumar, A., Seal, S., and Shah, V., Understanding the toxicity of aggregated zero valent copper nanoparticles against *Escherichia coli*, *J. Hazard Mater.*, 2010, **180**, 212-216.
10. Son, J., Shin, K. I., & Cho, K., Response surface model for predicting chronic toxicity of cadmium to *Paronychiurus kimi* (Collembola), with a special emphasis on the importance of soil characteristics in the reproduction test, *Chemosphere*, 2009, **77**, 889-894.
11. Lai, R. W. S., Yeung, K. W. Y., Yung, M. M. N., Djurišić, A. B., Giesy, J. P., and Leung, K. M. Y., Regulation of engineered nanomaterials: current challenges, insights and future directions, *Environ. Sci. Pollut. Res.*, 2018, **25**, 3060-3077.
12. Linkov, I., Satterstrom, F. K., Monica, J. C. Jr, Hansen S. F., Davis, T. A., Nano risk governance: current developments and future perspectives. *Nanotech. L. & Bus*, 2009, **6**, 203–220.
13. Malloy T. F., Nanotechnology regulation: a study in claims making, *ACS Nano*, 2011, **5**, 5–12.
14. Gottschalk, F., Sonderer, T., Scholz, R. W., & Nowack, B., Modeled environmental concentrations of engineered nanomaterials (TiO<sub>2</sub>, ZnO, Ag, CNT, fullerenes) for different regions, *Environ. Sci. Technol.*, 2009, **43**, 9216-9222.
15. Sun, T. Y., Gottschalk, F., Hungerbühler, K., & Nowack, B., Comprehensive probabilistic modelling of environmental emissions of engineered nanomaterials, *Environ. Pollut.*, 2014, **185**, 69-76.
16. Boxall, A. B. A., Chaudhry, Q., Sinclair, C., Jones, A., Aitken, R., Jefferson, B., & Watts, C. (2007). Current and future predicted environmental exposure to engineered nanoparticles. Report to Department for Environment, Food & Rural Affairs (DEFRA), United Kingdom. p.9.

17. Leung, Y. H., Chan, C. M., Ng, A. M., Chan, H. T., Chiang, M. W., Djurišić, A. B., Ng, Y. H., Jim, W. Y., Guo, M. Y., Leung, F. C., Chan, W. K., and Au, D. T., Antibacterial activity of ZnO nanoparticles with a modified surface under ambient illumination, *Nanotechnology*, 2012, **23**, 475703.
18. Sharma, S., Kumar, K., Thakur, N., Chauhan, S., & Chauhan, M. S., The effect of shape and size of ZnO nanoparticles on their antimicrobial and photocatalytic activities: a green approach. *Bull. Mater. Sci.*, 2020, **43**, 20.
19. Water Environment Partnership in Asia (WEPA) (2017). Water Standards of Partner Countries. Retrieved from <http://wepa-db.net/en/topic/waterstandard/index.html> (accessed on 4 April 2020)
20. Ministry of Ecology and Environment of China (1998). Sea water quality standard (GB 3097-1997). Retrieved from [http://english.mee.gov.cn/Resources/standards/water\\_environment/quality\\_standard/200710/t20071024\\_111791.shtml](http://english.mee.gov.cn/Resources/standards/water_environment/quality_standard/200710/t20071024_111791.shtml) (accessed on 4 April 2020)
21. Environmental Protection Agency of United States (USEPA) (1995). National Recommended Water Quality Criteria - Aquatic Life Criteria Table. Retrieved from <https://www.epa.gov/wqc/national-recommended-water-quality-criteria-aquatic-life-criteria-table#main-content> (accessed on 4 April 2020)
22. Australian Government Initiative (2019). Toxicant default guideline values for water quality in aquatic ecosystems. Retrieved from <https://www.waterquality.gov.au/anz-guidelines/guideline-values/default/water-quality-toxicants/search> (accessed on 4 April 2020)
23. Cole, S., Codling, I. D., Parr, W., Zabel, T., Nature, E., & Heritage, S. N. (2000). Guidelines for managing water quality impacts within UK European Marine sites. Retrieved from [https://ec.europa.eu/environment/life/project/Projects/index.cfm?fuseaction=home.showFile&rep=file&fil=UK-MARINE-SACS\\_water\\_quality.pdf](https://ec.europa.eu/environment/life/project/Projects/index.cfm?fuseaction=home.showFile&rep=file&fil=UK-MARINE-SACS_water_quality.pdf) (accessed on 4 April 2020)
